# Supplementary material for: Video-assisted self-reflection of resuscitations for resident education and improvement of leadership skills: A&nbsp;pilot study
Source: Springer Nature journal article supplement (doi:10.1007/s40037-021-00690-9), 2021-11-16
Supplement: MOESM2 [file 19874446]

Intended for 2 objective attendings to evaluate resident leader of the medical resuscitation. This will be completed for both groups (*residents who will view video feedback, and residents who will not*) before and after video analysis intervention. The goal will be to compare the delta in CALM scores between the residents who get the video analysis intervention and the residents who reflect without video. Tool replicated from Dr. Kessler. Designed for minimal user training and real-time assessment of data. Has shown high inter-rater reliability.

## Concise Assessment of Leader Management\*

### Leadership

- Announced role as leader  Yes  No
- Clear Role as leader throughout case  Rarely  Sometime  Mostly  Always
- Style appropriate and effective for situation  Rarely  Sometime  Mostly  Always

### Communication

- Voice Appropriately loud and clear  Rarely  Sometime  Mostly  Always
- Addresses people explicitly (*by name*)  Rarely  Sometime  Mostly  Always
- Reinforces closed loop communication  Rarely  Sometime  Mostly  Always

### Team Management

- Assigns or Acknowledges Roles  Rarely  Sometime  Mostly  Always
- Directs team effectively / assigns tasks  Rarely  Sometime  Mostly  Always
- Balances work load of team  Rarely  Sometime  Mostly  Always
- Engages team members in decision making  Rarely  Sometime  Mostly  Always
- Summarizes case status periodically  Rarely  Sometime  Mostly  Always

### Medical Management

- Prioritizes task order  Rarely  Sometime  Mostly  Always
- Maintains global view (*avoids fixation bias*)  Rarely  Sometime  Mostly  Always
- Periodically reassesses patient  Rarely  Sometime  Mostly  Always
- States next steps in patient care  Rarely  Sometime  Mostly  Always
- Aware of limitations and seeks help as needed  Rarely  Sometime  Mostly  Always

\*Replicated from:

Nadkarni LD, Roskind CG, Auerbach MA, Calhoun AW, Adler MD, Kessler DO. The Development and Validation of a Concise Instrument for Formative Assessment of Team Leader Performance During Simulated Pediatric Resuscitations. Society for Simulation in Healthcare. 2017.
